# Supplementary material
Source: PubMed Central journal article supplement (PMC6194229)

Extended data fig 1c: WT, 4 days, gP

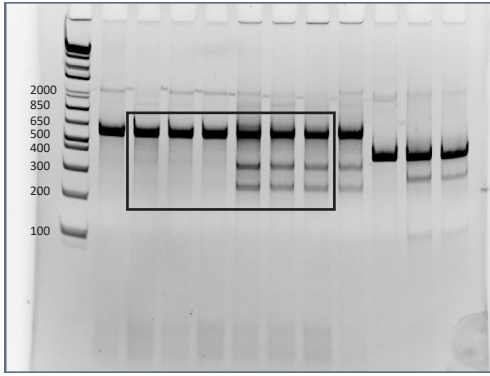

Extended data fig 1c: KI, 4 days, gP

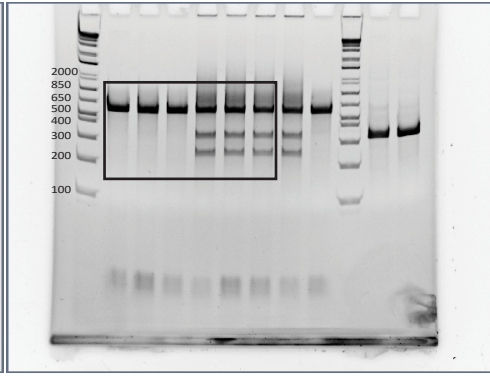

Extended data fig 1c: WT, 3 weeks, gP

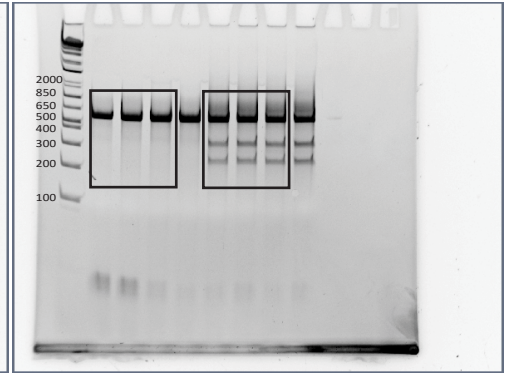

Extended data fig 1c: KI, 3 weeks, gP

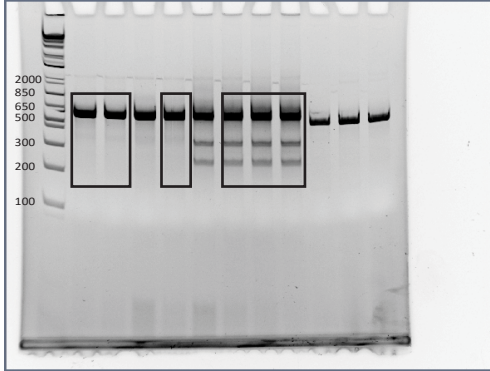

Extended data fig 6b: WT, 4 days, gM

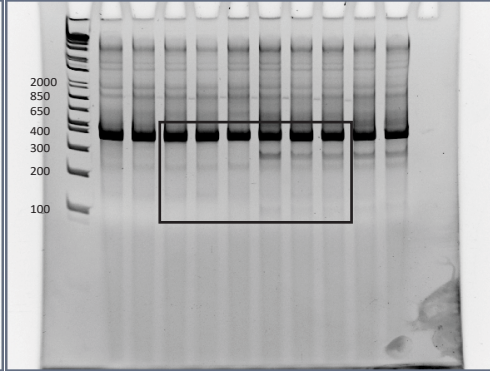

Extended data fig 6b: KI, 4 days, gM

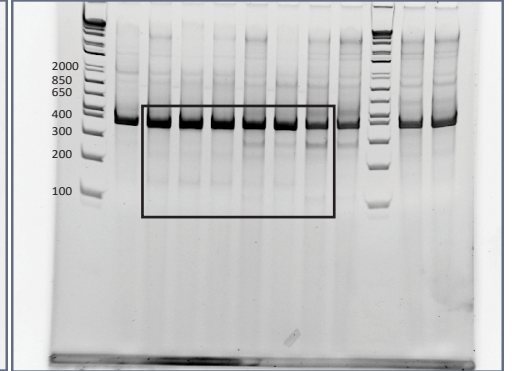

Extended data fig 6b: WT, 3 weeks, gM

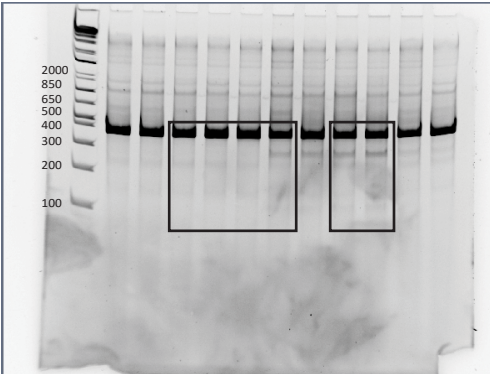

Extended data fig 6b: KI, 3 weeks, gM

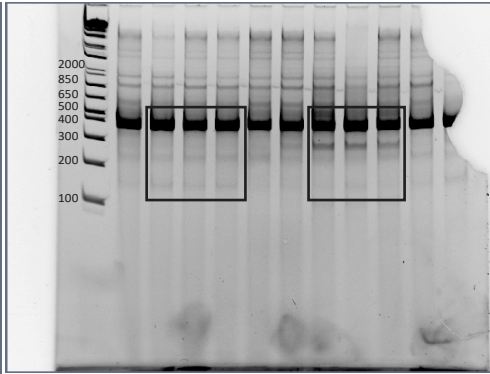

Extended data fig 6b: WT, 4 days, gMH (mouse)

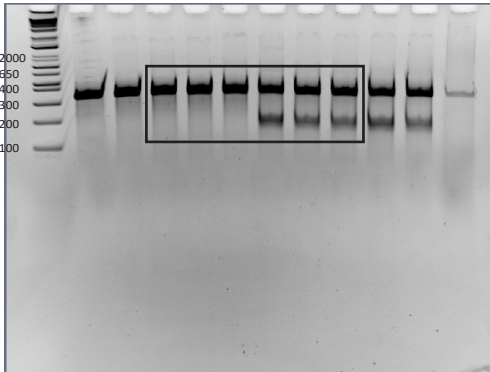

Extended data fig 6b: KI, 4 days, gMH (human)

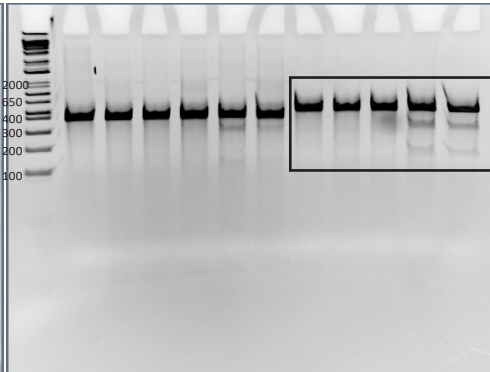

Extended data fig 6b: KI, 4 days, gMH (mouse)

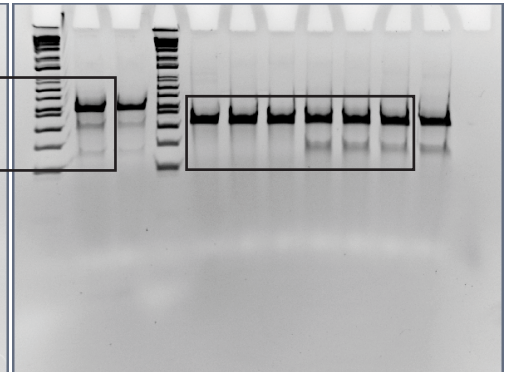

Extended data fig 6b: WT, 3 weeks, gMH (mouse)

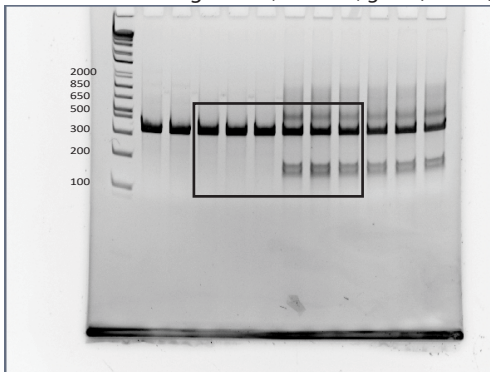

Extended data fig 6b: KI, 3 weeks, gMH (mouse)

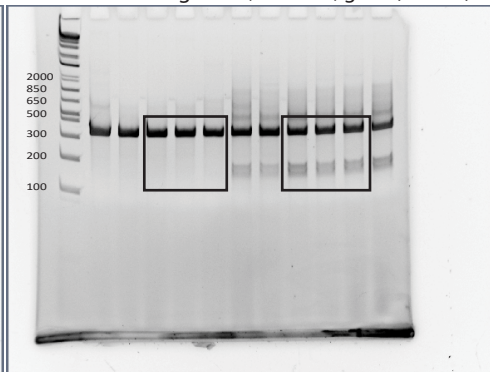

Extended data fig 6b: KI, 3 weeks, gMH (human)

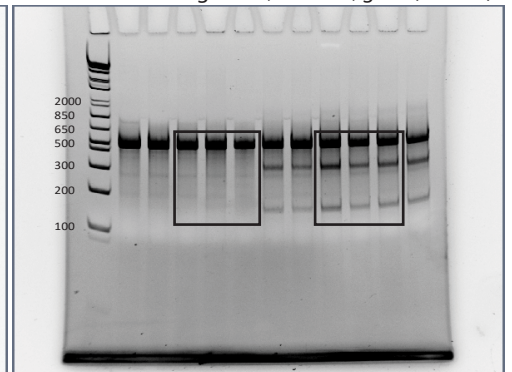

Supplement: NIHMS1500756-supplement-2.pdf [file NIHMS1500756-supplement-2.pdf]
